# Supplementary material for: Globo-H Ceramide Shed from Cancer Cells Triggers Translin-Associated Factor X-Dependent Angiogenesis
Source: Oxford University Press journal article supplement (doi:10.1158/0008-5472.can-14-1651), 2014-10-03
Supplement: 00085472can141651-sup-132524_1_supp_2598118_n9vndr.doc [file 00085472can141651-sup-132524_1_supp_2598118_n9vndr.doc]

**Supplementary data**

**Material and Methods**

**Immunoprecipitation, silver stain, Mass spectrometry and Immunoblotting**.

After incubation of HUVECs with 20 M GHCer for 2 hrs at 37°C, cells were washed three times with cold PBS and scraped from the dish in cold immunoprecipitation buffer (50 mM HEPES, pH 7.0/150 mM NaCl/ 10% glycerol/1.0% NP-40/1.5mM MgCl2/1mM EGTA/10 M sodium pyrophosphate/100 mM NaF/1 mM PMSF/protease inhibitor cocktail (Roche), and then sonicated in ice for 5 min. The lysates were centrifuged (12,000xg for 5 min), and supernatant was assayed for protein content. Aliquots (2mg/ml of protein) of samples were incubated at 4°C overnight with mAbVK9, anti-TRAX (Santa Cruz Biotechnology, Santa Cruz, CA) or isotype control antibodies (2g) and then mixed with protein A sepharose beads (GE) and incubated at 4°C for 1hrs. The immune complexes bound on the beads were washed three times with immunoprecipitation buffer, and the bound proteins were eluted by boiling in sample buffer for 10 min. Proteins were separated by SDS/PAGE and stained with silver according to standard procedure. In-gel digestion of a protein band with MW~ 35kDa found only in mAbVK9 treated cells was performed, followed by LTQ-FT analysis. In addition, SDS/PAGE gels were immunoblotted with the anti-TRAX or PLC1 antibody (Santa Curz). Bound lipids were extracted by chloroform/ methanol (1:2, vol/vol) and dried in a vacuum centrifuge followed by Dot-blot immunostaining. Dot-blot immunoblotting was performed by Bio-Dot microfiltration apparatus (Bio-Rad) using mAbVK9.

**Sorting of MCF-7 cells**

For inoculation into NSG mice, Globo-Hlow and Globo-Hhigh MCF-7 cells sorted by FACS Aria were suspended in serum-free MEM at a concentration of 5 × 106 cells in 100 μl with 2mg/ml matrigel, and injected subcutaneously (s.c.) into the mammary gland of 8-week-old female NSG mice. Tumor volumes were monitored with a caliper. The mice were sacrificed approximately 32 days after inoculation, and the tumors were removed and for further FACS and histologic analysis.

**Homology modeling of PLC1 protein**

The structure of human PLC1 protein was modeled using PLC3 (Protein Date Bank code: 4GNK; Chain E) (1), which is homologous to PLC1, as a template. First, the alignment of protein sequences of C-terminal domain of PLC3 with its homolog was made by Blastp (http://blast.ncbi.nlm.nih.gov). The 3D structure of PLC1 was then constructed using Modeller 9v4 (2), with the functions of the AUTOMODEL class in python scripts. The “Discrete Optimized Protein Energy” (DOPE) method (2) was used to select the best model from the 10 initially-generated models. Finally, the model was subjected to energy minimization using DeepView vers. 3.7 (3) with the GROMOS 43B1 force field, until the delta E between the two steps dropped below 0.05 KJ/mol.

**Prediction of PLC1-binding region on TRAX**

The potential PLC1-binding region on TRAX was predicted using protein-protein docking which was performed on GRAMM-X Server v.1.2.0 (http://vakser.bioinformatics.ku.edu/resources/gramm/grammx/) (4) to generate 40 potential PLC1-TRAX complexes. The inter-molecular interaction between PLC1 and TRAX was further estimated by HotLig package (5) to sort out the top 10 ranked PLC1-TRAX models. The prediction of PLC1-binding region on TRAX was based on binding frequency of a TRAX atom contacted by a PLC1 atom in these 10 models. According to the hydrophobic potential function in HotLig (5), hydrophobic effect occurs when the molecular surface distance between two atoms is < 5 Å. Hence, here we defined that two atoms are “binding” when their atomic surface distance is < 5 Å. The binding frequency (*f*) of a TRAX atom *i* was counted using the following equation:

(1)

The *Ntotal* is the number of total models (*i.e.*, *Ntotal* = 10), and the *Nbinding*(*i*) is the count of PLC1 models binding with atom *i*. The high binding frequency of an atom on TRAX means that it possesses high probability to interact with PLC1.

**Molecular docking of Globo-H against TRAX**

Molecular docking of Globo-H against TRAX was performed using Dock 5.1.1 (6) to generate possible protein-ligand binding modes. Subsequently, the HotLig (5) software was applied to analyze intermolecular interaction. To predict potential binding pocket for Globo-H, the cavities on TRAX were first detected using PscanMS (5); then these cavities were subjected to the Dock software for docking calculation. Kollman partial charges were applied to protein models for the force field calculation in the Dock software. Energy-optimized three-dimensional coordinates of Globo-H were generated using Marvin 5.2.2 (7) and Balloon 0.6 (8) software. Additionally, the Gasteiger partial charges on atoms of Globo-H were calculated by OpenBabel 2.2.3 (9). The parameters for the Dock were set to generate 2000 orientations and 200 conformers per cycle of conformational search in the binding pocket with setting “anchor size” to 1. The docked conformers were then scored and ranked by HotLig(5) to predict molecular interaction between globo H and TRAX. The Fig.s for molecular modeling and interactions were rendered using Chimera (10) and Ligplot (11) software, respectively. The electrostatic potentials of protein were calculated using Delphi (12) with default parameters setting in the Chimera (10).

**Supplemental Result of computer modeling**

The TRAX protein is known to associate with the C-terminal region of PLC1, thereby inhibiting the activation of PLC1(13). The structure of human TRAX, as characterized by x-ray crystallography (PDB code: 3PJA) (14), consists of seven alpha helices (1–7 in Supplementary Fig. S2A). Since the structure of human PLC1 is still unknown, we first created a protein model of human PLC1 (Supplementary Fig. S2B) using methods of homology modeling, and then analyzed its molecular interaction with TRAX through protein-protein docking (see Methods). The C-terminal region of PLC1, which is reported to be involved in the interaction with TRAX (13), was predicted as a helix domain (Supplementary Fig. S3) by Psipred (http://bioinf.cs.ucl.ac.uk/psipred/). Therefore, we modeled the main C-terminal helix domain of PLC1 (A890–I1161) based on the structural information of its homolog, PLC3. The similarity of protein sequences between PLC1 and PLC3was 58%, with 34% of identities within the overlapping 272 amino acids (A890–I1161) of PLC1 (Supplementary Fig. S4). As shown in Supplementary Fig. S2B, the modeled structure of the C-terminal domain of PLC1 is composed of three helices.

To predict the potential binding region for PLC1 on TRAX, protein-protein docking was performed as described in Methods. Among the top 10 ranked complex models, the binding frequencies of TRAX atoms bound by PLC1 (atomic surface distance < 5 Å) were calculated using eq. 1 described in Methods to show the most likely zone for binding of PLC1 (Fig. 5A–B). The top 1 ranked model of PLC1 binding to TRAX is shown in Fig. 5A; and the representative top 5 models were shown in Supplementary Fig. S5. The predicted PLC1-binding region predominantly distributed around a concave region formed by 4, 5 and 6 (*i.e.*, the red and magenta area in Fig. 5B). The other side of TRAX (the 1-side) seems not be involved in binding of PLC1.

To investigate whether Globo-H binds to TRAX, and whether the binding of Globo-H interferes with the interaction of PLC1 on TRAX, the binding mode of the TRAX-Globo-H complex was predicted through molecular docking studies (see Methods). Globo-H consists of a hydrophilic hexasaccharide and a hydrophobic ceramide, which is a conjugate of a sphingosine and a fatty acid (Fig. S2C). To predict the potential binding pocket for Globo-H, the cavities on TRAX were first detected using PscanMS (5); these cavities were then subjected to the Dock software(6) for sampling of potential conformers of Globo-H docking to the TRAX protein structure. Subsequently, these conformers were scored and ranked by HotLig (5) to predict the binding mode and molecular interactions between Globo-H and TRAX. Fig. 5C–5D show the predicted binding mode of Globo-H in complex with TRAX. Generally, the Globo-H molecule binds to the predicted PLC1-binding region on TRAX (Fig. 5C). In addition, the electrostatic interaction of TRAX with Globo-H was computed and evaluated using Delphi (Fig. 5D). The carbon chain of sphingosine binds to the hydrophobic groove formed by 4, 5 and 6, which coincides with the most likely binding region for PLC1 as described above (red and magenta in Fig. 5A–5C). In addition, the hexasaccharide of Globo-H interacts with a polar surface region (Fig. 5D), which also overlaps with part of the predicted PLC1-binding region (compared to Fig. 5C). On the other hand, the 16-carbon fatty acid of Globo-H binds to another hydrophobic pocket between 3 and 6, which is beside the PLC1-binding region. The detailed molecular interactions between Globo-H and TRAX were further illustrated by a schematic diagram in Fig. 5E. Overall, Globo-H might bind to TRAX through hydrophobic and electrostatic interactions, and competitively interfere with the binding of PLC1.

**Supplementary Fig.:**


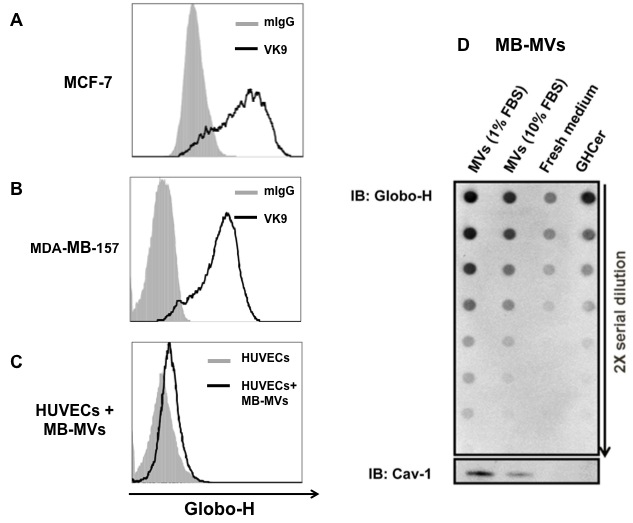


**Fig. S1: Globo-H expression on breast cancer cells and GHCer shed from MDA-MB-157 cells into MVs.**

The expression of Globo-H on (A) MCF-7 cells and (B) MDA-MB-157 cells was determined by flow cytometry with mAbVK9. (C) Microvesicles (MVs, 50g) harvested from the supernatants of MDA-MB-157 cells (MB-MVs) were incubated with HUVECs for 4h and examined for surface Globo-H. (D) Serial dilutions of MB-MVs, GHCer, and fresh medium were probed with mAbVK9. Caveolin-1 (Cav-1) is the marker for MVs. Serial dilutions of MVs, GHCer, and fresh medium were probed with mAbVK9. Caveolin-1 (Cav-1) is the marker for MVs.

**
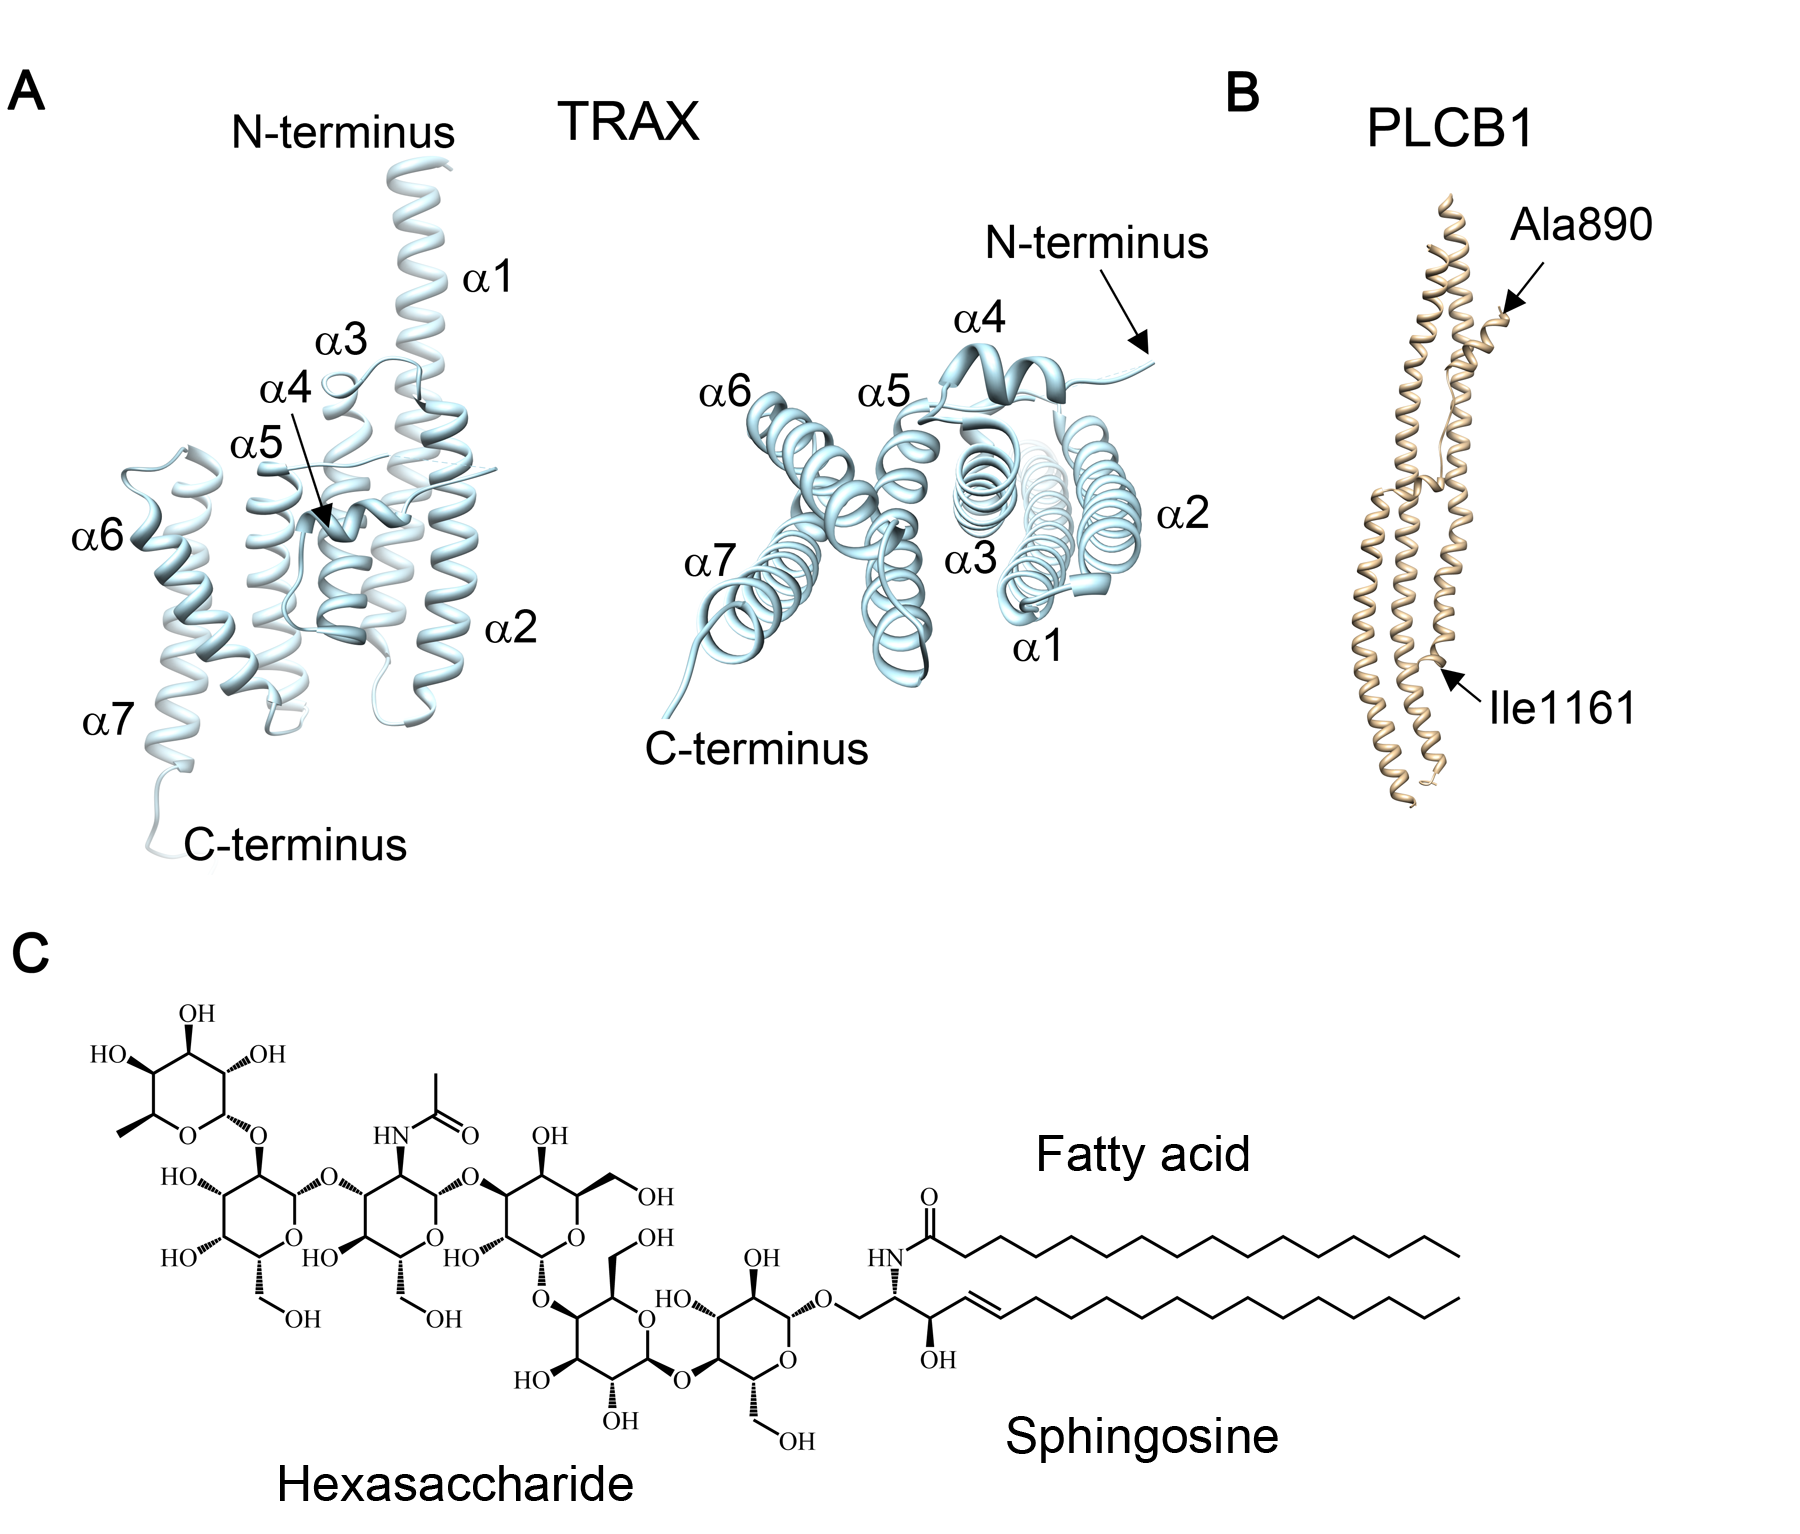
**

**Fig. S2:** **Structure of TRAX, PLC1 and Globo-H.** (A) The structure of TRAX consists of seven helices (PDB code: 3PJA). (B) Predicted structure of the C-terminal helix domain (A890–I1161) of human PLC1. (C) Structure of GHCer. GHCer consists of a hydrophilic hexasaccharide and a hydrophobic ceramide, which is a conjugate of sphingosine and fatty acid**.**

**
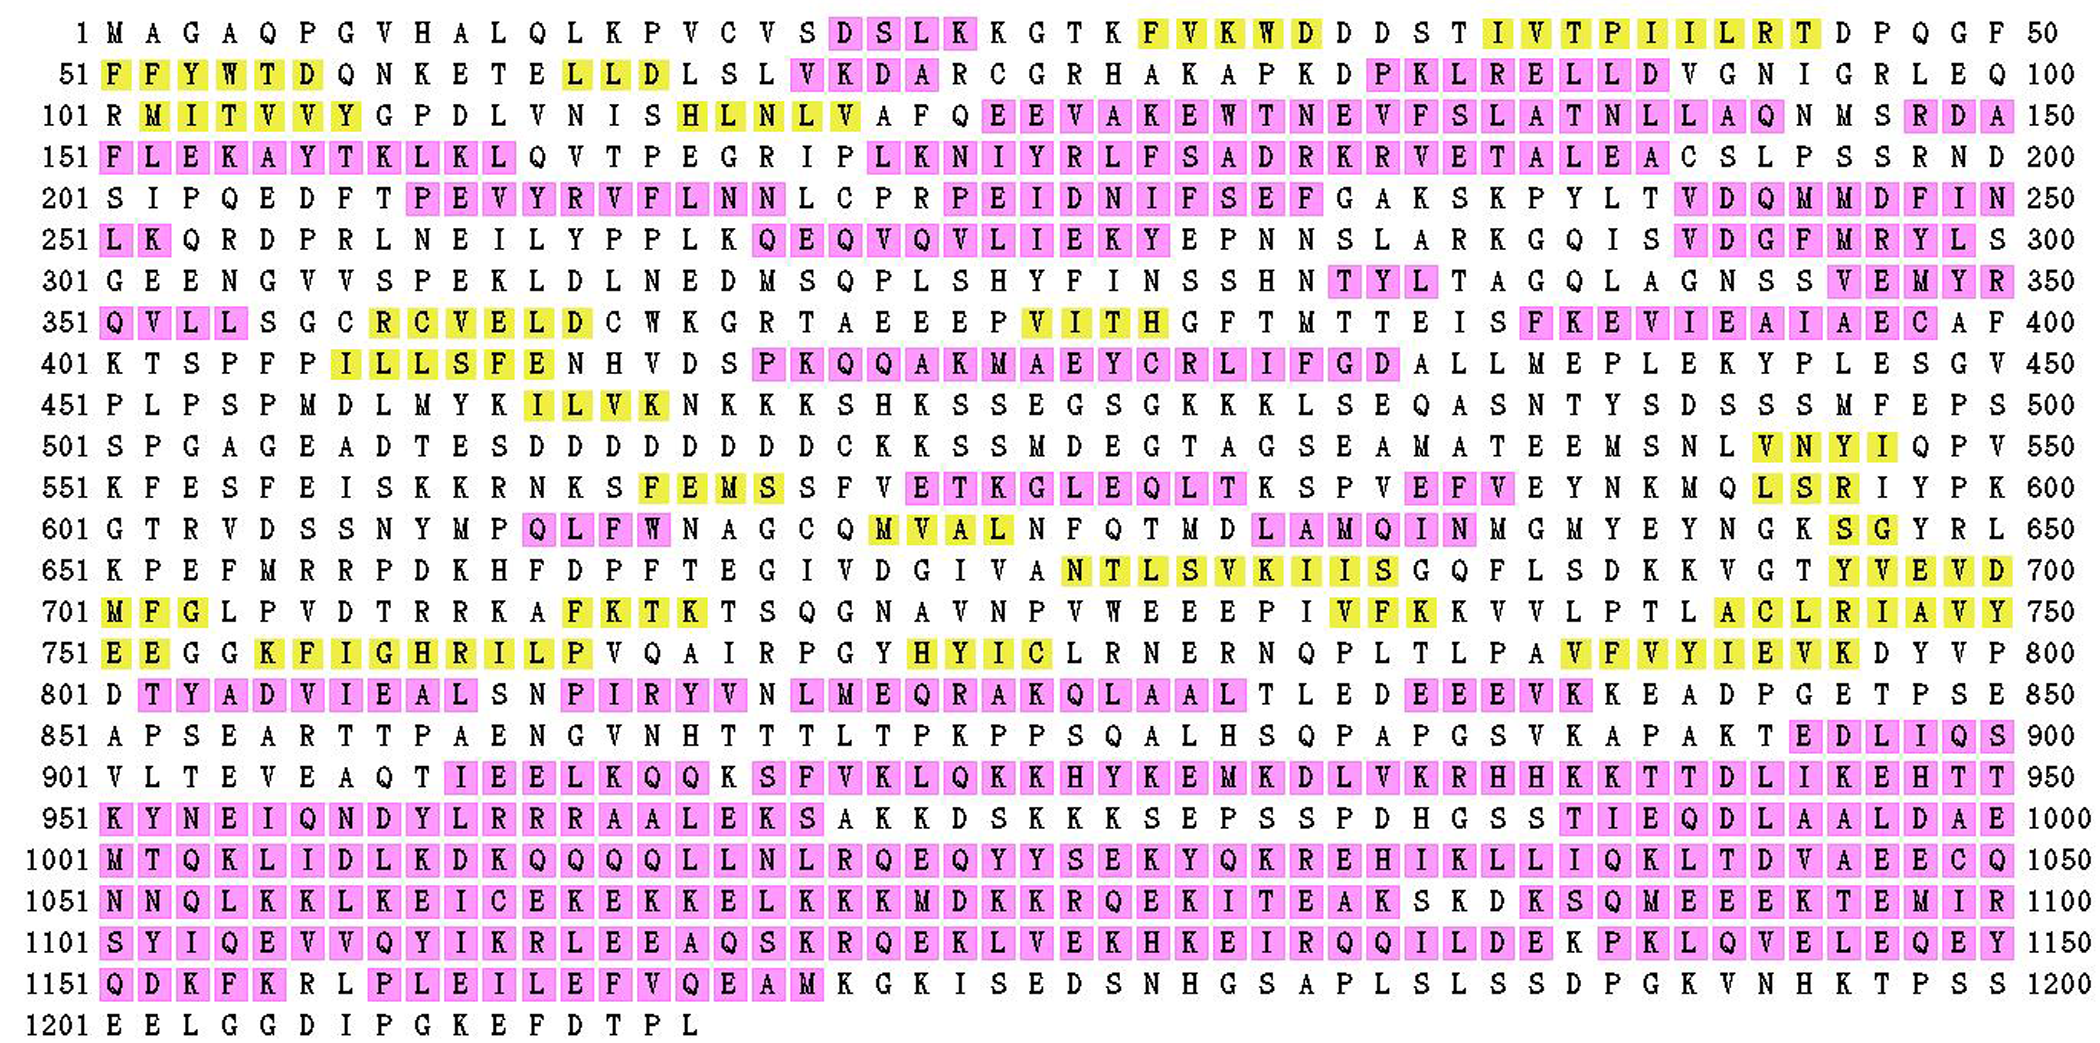
**

**Fig. S3: Secondary structure prediction of PLC1.** The C-terminal region of PLC1 was predicted as a helix (light purple color) domain by Psipred; the yellow color indicates the sequences of **-sheet.


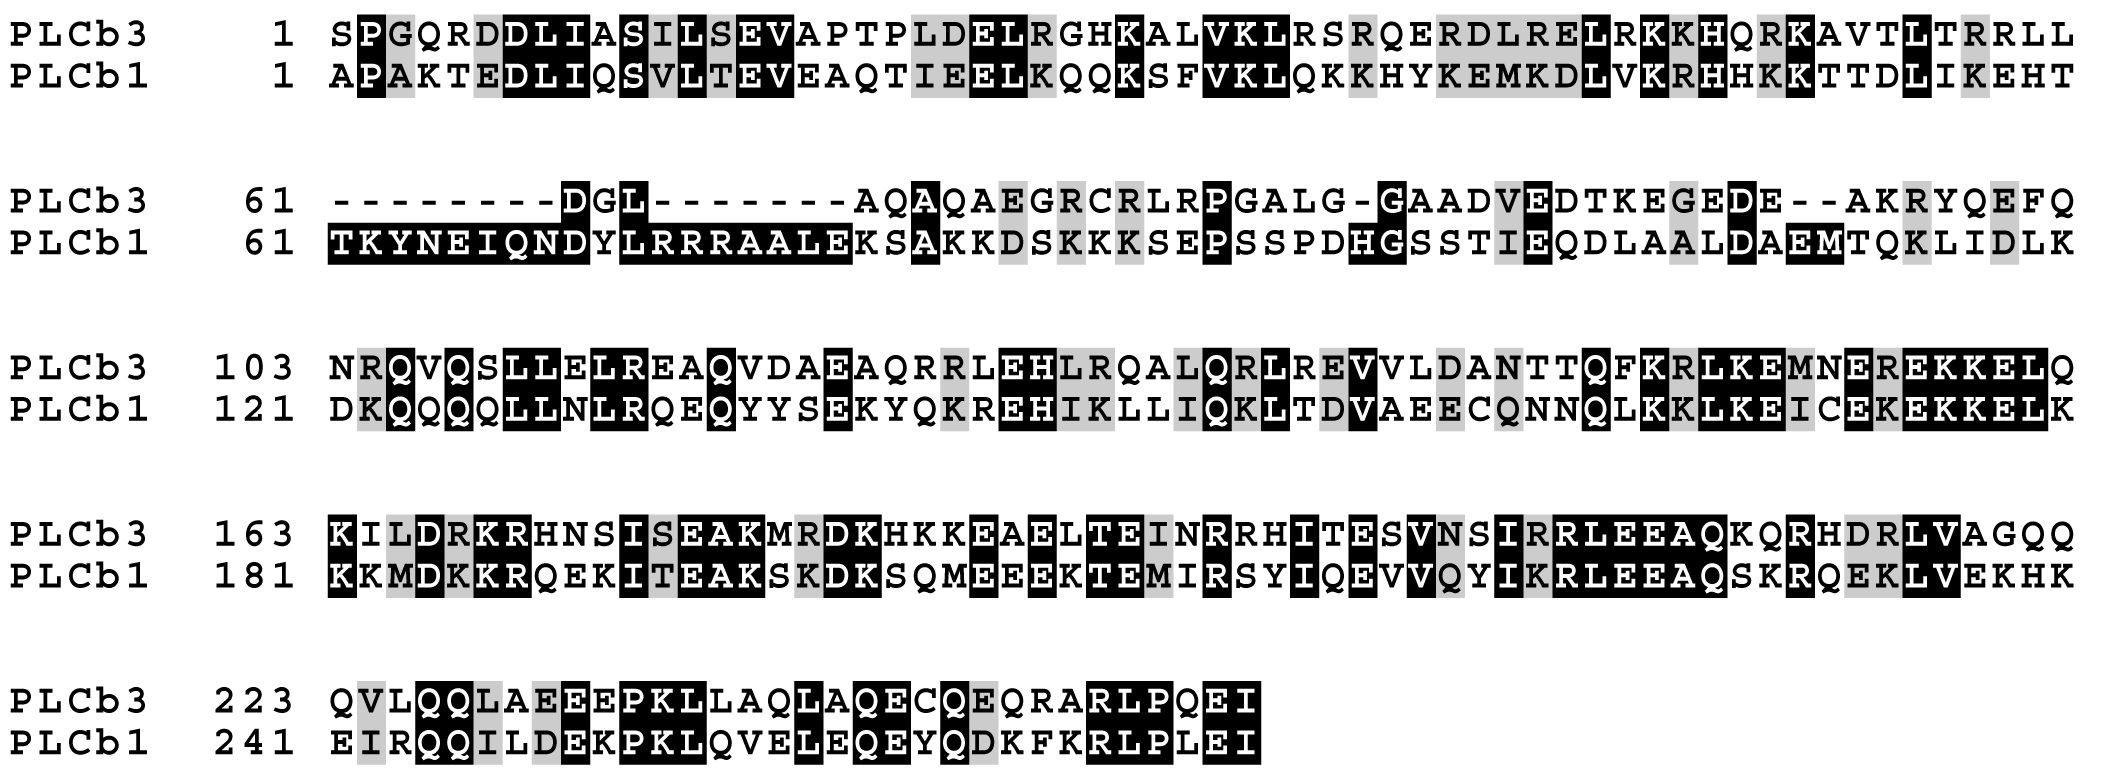


**Fig. S4: Amino-acid sequence alignment of PLC1 and PLC3.** The similarity of protein sequences between PLC1 and PLC3 was 58% with 34% identities within the overlapping 272 amino acids (A890–I1161) of PLC1.


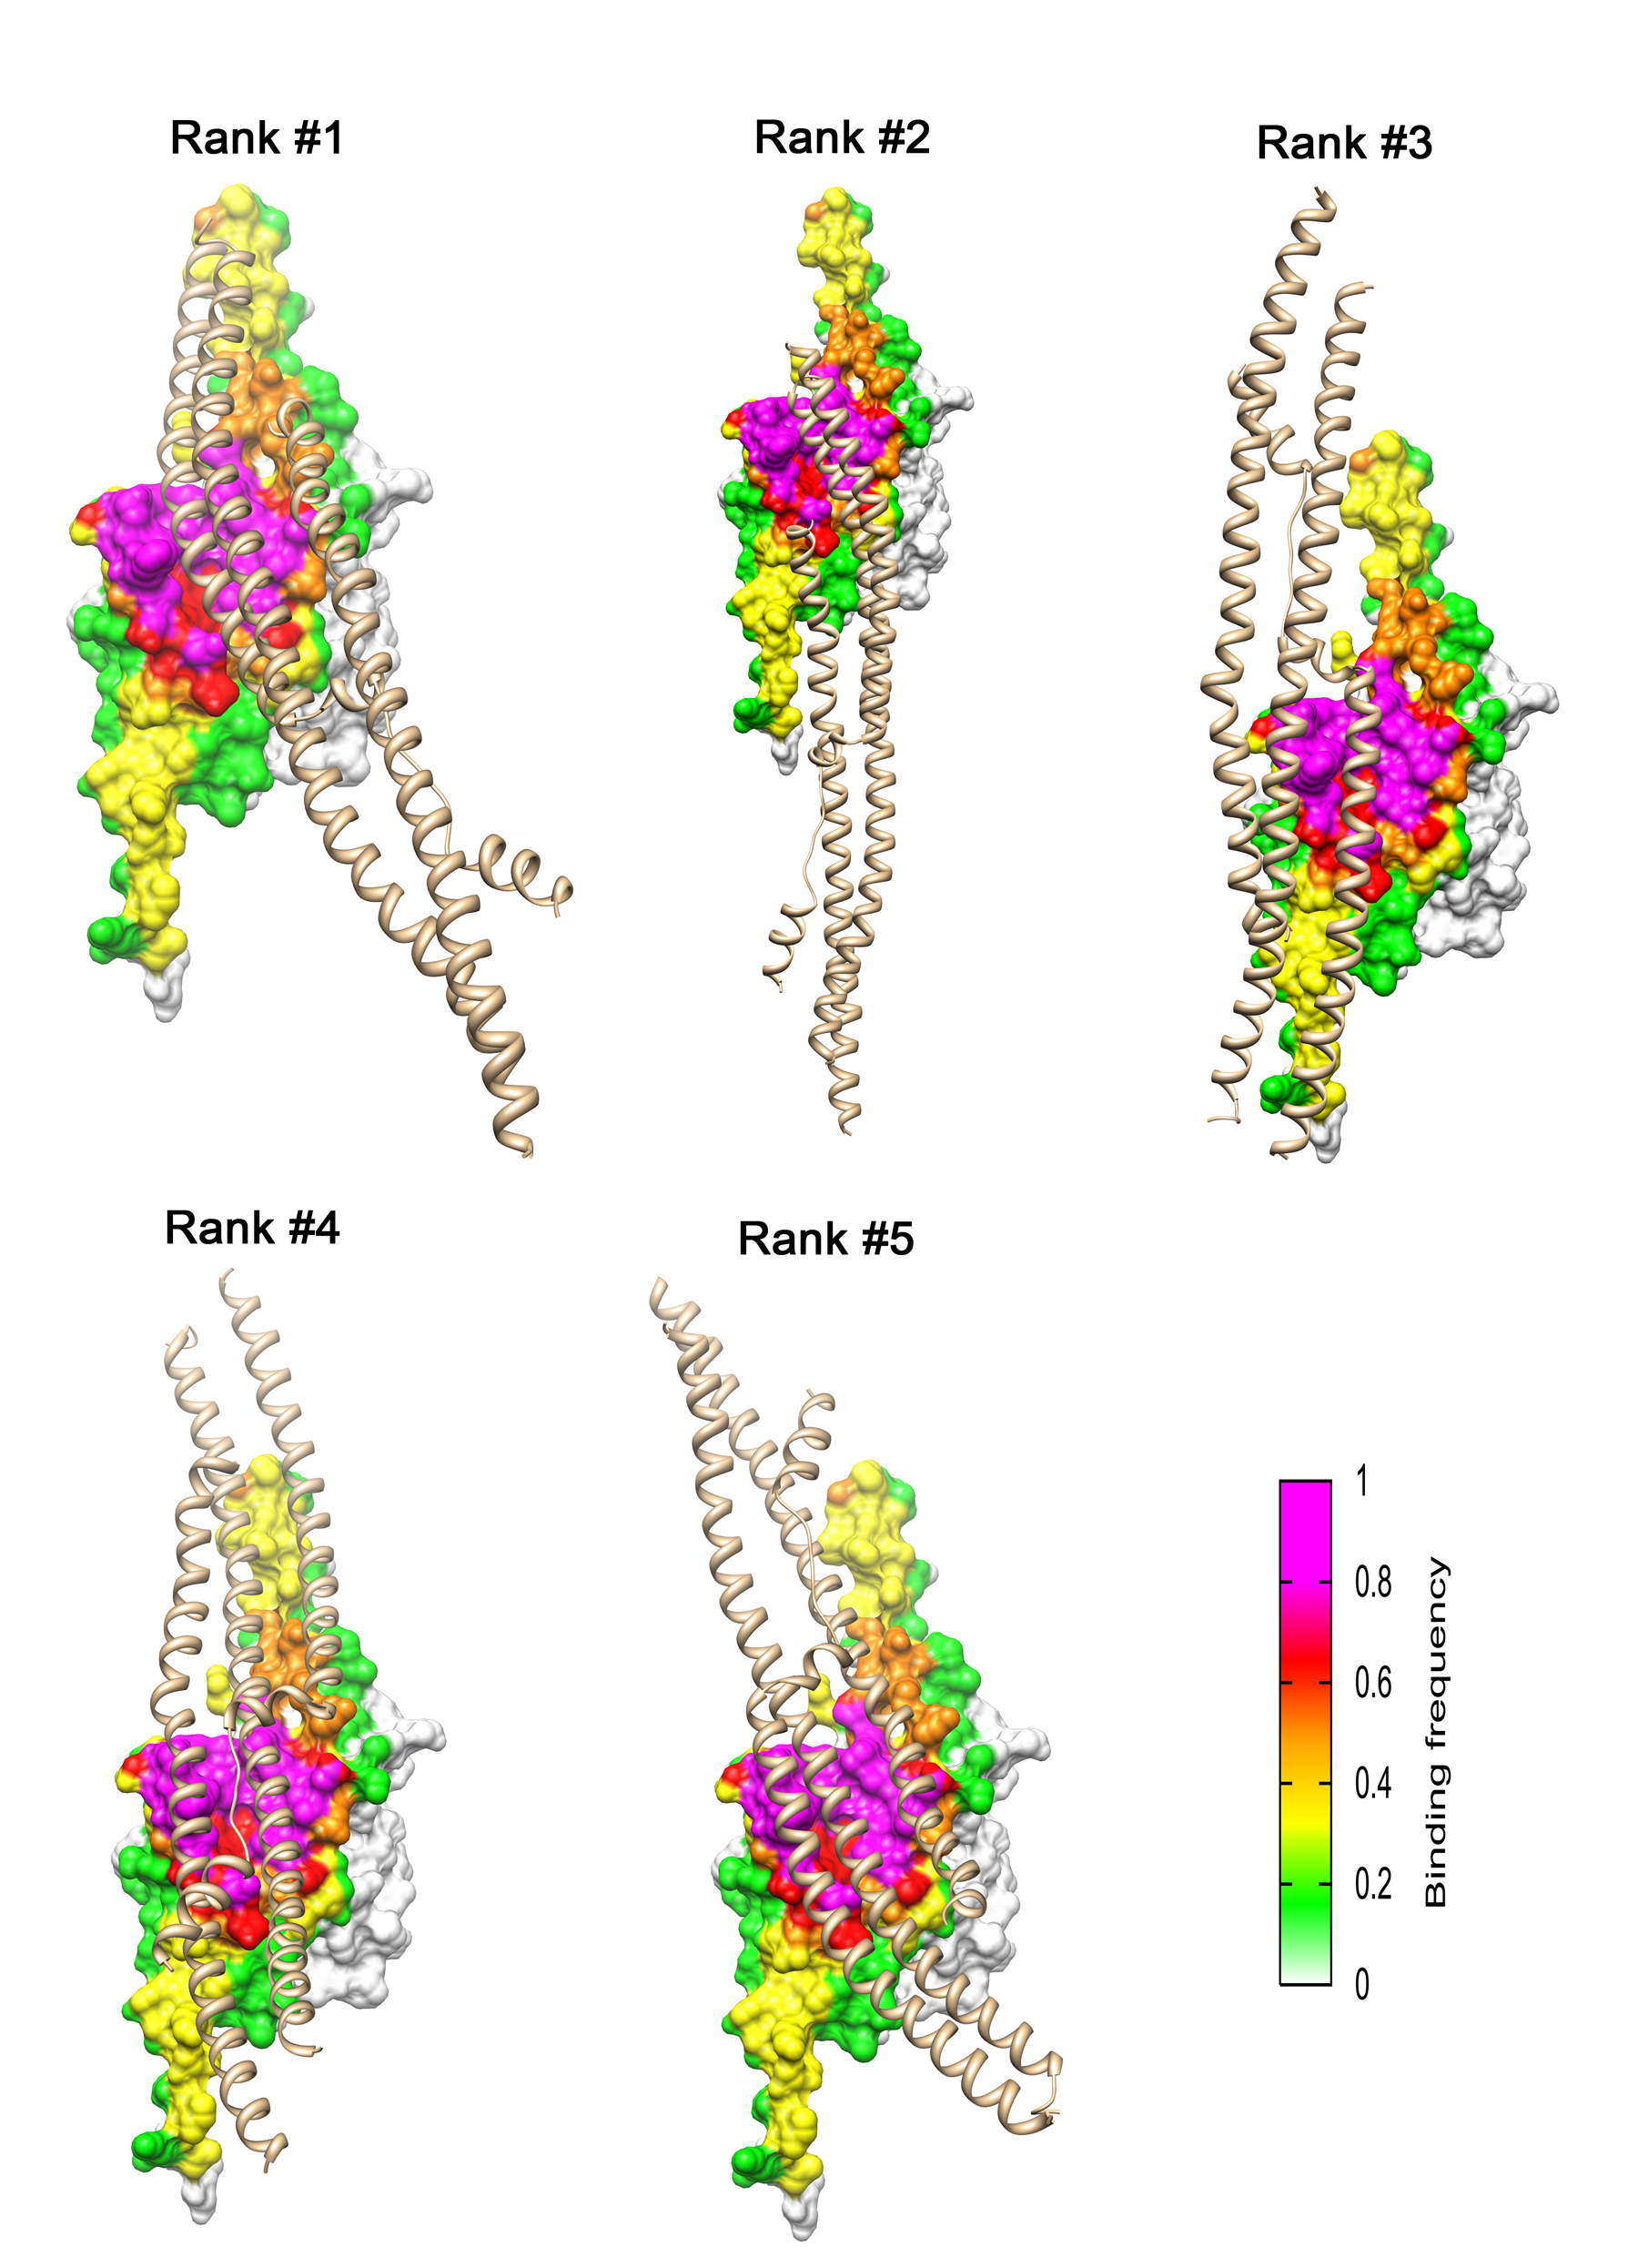


**Fig. S5: Prediction of TRAX-PLC1 binding complexes.**

**Reference in Supplemental data**
